# Supplementary material for: A prospective study validating a clinical scoring system and demonstrating phenotypical-genotypical correlations in Silver-Russell syndrome
Source: HighWire-hosted journal article supplement (doi:10.1136/jmedgenet-2014-102979), 2015-05-07
Supplement: jmedgenet-2014-102979supp_Scoring-System.pdf [file jmedgenet-2014-102979supp_Scoring-System.pdf]

**Physician Form – Silver Russell Syndrome Screening**  
*Using: Netchine-Harbison SRS/RSS Clinical Scoring System*

Child's Name: \_\_\_\_\_ Date of Birth: \_\_\_\_\_  
 Gender:        Male        Female        Gest Age:    \_\_\_ wks    \_\_\_ days  
 Father's Height: \_\_\_\_\_ Mother's Height: \_\_\_\_\_ Mid Parental Target Height (MPTH): \_\_\_\_\_

**Birth Measurements – SGA Evaluation**

|            |    |                |     |     |        |
|------------|----|----------------|-----|-----|--------|
| Birth Wt:  | kg | Birth Wt SDS:  | SDS | SGA | Yes/No |
| Birth Lth: | cm | Birth Lth SDS: | SDS | SGA | Yes/No |
| Birth HC:  | cm | Birth HC SDS:  | SDS |     |        |

**NH-CSS FACTORS:**

**RESULTS**

Please refer to accompanying page for definitions and notes for each scoring system factor

- |                                                                                                                                       |            |           |
|---------------------------------------------------------------------------------------------------------------------------------------|------------|-----------|
| • <b>Factor 1: Being born small-for-gestational-age</b>                                                                               | <b>YES</b> | <b>NO</b> |
| • <b>Factor 2: Relative macrocephaly at birth</b>                                                                                     | <b>YES</b> | <b>NO</b> |
| • <b>Factor 3: Postnatal growth failure <math>\leq -2SDS</math> at age 24months OR <math>\leq -2SDS</math> from MPTH at 24 months</b> | <b>YES</b> | <b>NO</b> |
| • <b>Factor 4: Feeding difficulties &amp;/or BMI <math>\leq -2SDS</math> at 24 months</b>                                             | <b>YES</b> | <b>NO</b> |
| • <b>Factor 5: Protruding forehead, age 1-3yrs</b>                                                                                    | <b>YES</b> | <b>NO</b> |
| • <b>Factor 6: Body asymmetry</b>                                                                                                     | <b>YES</b> | <b>NO</b> |

**Total Number of Factors Present in Child:        \_\_\_ of 6**

**Score of 4-6 = Possible SRS/RSS**

- Implement SRS/RSS molecular testing to investigate the known molecular SRS/RSS etiologies
- If the molecular testing cannot be performed or is negative, a child may be clinically diagnosed as SRS/RSS if differential diagnoses have been ruled out [e.g., Bloom, Fanconi, Mulibrey-Nanism, 3-M syndrome...]

**Score of 3 or less = Unlikely SRS/RSS**

- Using the list of other typical SRS/RSS characteristics below may be helpful in detecting the rare false negative SRS/RSS patients (a small number of mUPD7 children, or 11p15 children with tall parents, may score unlikely on the SRS/RSS scoring system).

**Other SRS/RSS Physical Characteristics** (each of these has been found to be statistically more significant in specific SRS/RSS groups but can also be found in non-SRS/RSS SGA/IUGR children):

- |                                                               |                                                     |
|---------------------------------------------------------------|-----------------------------------------------------|
| ___ Downturned mouth (90% of 11p15)                           | ___ Low muscle mass (80% of 11p15 & 70% of mUPD7)   |
| ___ Clinodactyly of the 5 <sup>th</sup> finger (90% of 11p15) | ___ Prominent heel (100% of mUPD7)                  |
| ___ Shoulder dimples (70-75% 11p15 & mUPD7)                   | ___ Autism/PDD (50% of mUPD7)                       |
| ___ Syndactyly of the 2/3 toes (90% of 11p15)                 | ___ Diagnosed cognitive disabilities (75% of mUPD7) |

\* incidence percentages are approximate

## *Netchine-Harbison SRS/RSS Clinical Scoring System - Factor Definitions and Notes*

- **Factor 1: Being born small-for-gestational-age**

**DEFINED:**  $\leq -2\text{SDS}$ \* birth length and/or weight adjusted for gestational age (GA)

\* according to Usher and Mc Lean references

**NOTES:** The GA used should be the *first* one given to the mother and not a corrected one (often times, a due date is moved later due to the fetus measuring smaller than expected).

- **Factor 2: Relative macrocephaly at birth**

**DEFINED:** Birth head circumference SDS  $\geq 1.5\text{SDS}$  than birth weight or length, SDS\* adjusted for gestational age

\* according to Usher and Mc Lean references

**NOTES:** Use the first available HC in first month if birth HC is unavailable or is questionable in accuracy.

- **Factor 3: Postnatal growth failure  $\leq -2\text{SDS}$  at age 24mos or  $\leq -2\text{SDS}$  from MPTH**

**DEFINED:**  $-2\text{SDS}$  at/about 24 months compared to mean and/or compared to MPTH

**NOTES:** Make sure to note if a child is  $-2\text{SDS}$  from MPTH even if he is not  $-2\text{SDS}$  from the mean.

- **Factor 4: Feeding difficulties and/or low BMI at 24 months**

**DEFINED:** A BMI  $\leq -2\text{SDS}$  at 24 months OR be tube-fed OR already be on cyproheptadine for appetite stimulation

- **Factor 5: Protruding forehead, age 1-3yrs**

**DEFINED:** This factor requires that the forehead protrudes from the plane of the face (defined as a forehead that projects beyond the facial plane when viewed laterally); the forehead may also be high but **MUST** protrude. See photo examples on back side

**NOTES:** For older children, scoring this factor requires looking at photos of the child between 1-3 years of age (due to fact that this factor is less evident in infancy and often disappears after age 3 years). The most typical SRS/RSS forehead is easier to diagnose due to its severity in protrusion but milder protrusion can be difficult to assess.

- **Factor 6: Body asymmetry**

**DEFINED:** a leg length discrepancy (LLD) of  $\geq .5\text{cm}$  OR arm asymmetry OR LLD  $< .5\text{cm}$  with at least two other asymmetric body parts (with one being a non-face part)

*Netchine-Harbison SRS/RSS Clinical Scoring System  
Representative Photos*

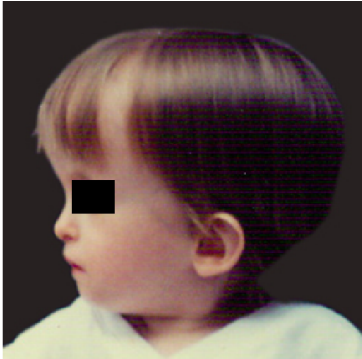

**Significant protruding forehead**

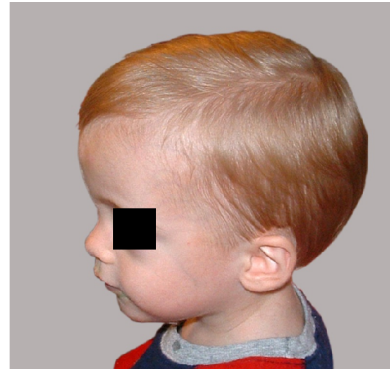

**Moderate protruding forehead**

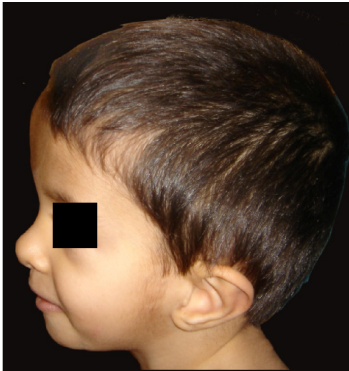

**Mild forehead protrusion**

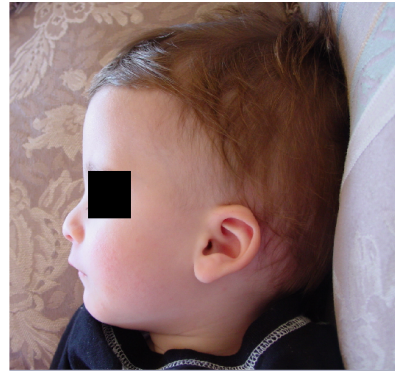

**NO forehead protrusion but high**

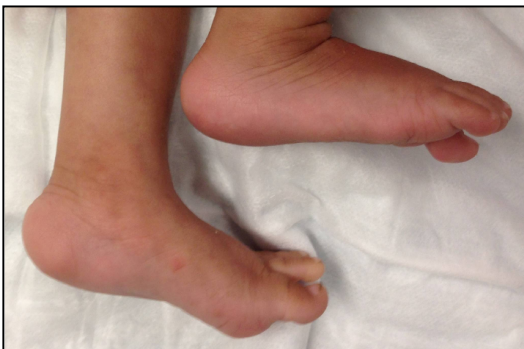

**Prominent heel**

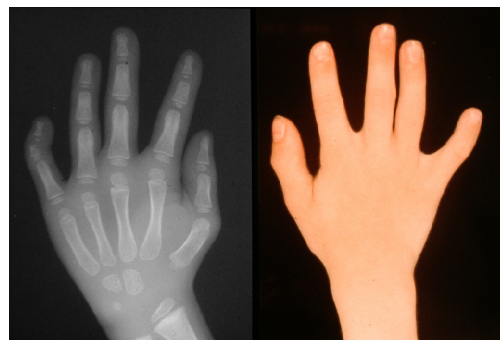

**Clinodactyly of 5<sup>th</sup> finger**
